# Supplementary material
Source: bioRxiv or medRxiv preprint supplement (https://www.biorxiv.org/highwire/filestream/106670/field_highwire_adjunct_files/4/351635-5.pdf)
Supplement: Supplementary file [file 351635-5.pdf]

**Supplementary Table 4.** Oligonucleotides used for qRT-PCR, cloning and genotyping.

| Name                          | Target gene               | Sequence (5'-3')                                             | Purpose    |
|-------------------------------|---------------------------|--------------------------------------------------------------|------------|
| qFER1 F                       | <i>At5g01600</i>          | TCCCAGTTAGCTGATTTCCG                                         | Q-RT-PCR   |
| qFER1 R                       | <i>AtFER1</i>             | CTTTGCCGATCATCCTTAGC                                         |            |
| qAtIRT1F                      | <i>At4g19690</i>          | CGTGCGTCAACAAAGCTAAA                                         | Q-RT-PCR   |
| qAtIRT1R                      | <i>AtIRT1</i>             | TCTGGTTGGAGGAACGAAAC                                         |            |
| qFRO2f                        | <i>Ag1g01580</i>          | GATCGAAAAAAGCAATAACGGTGGTT                                   | Q-RT-PCR   |
| qFRO2r                        | <i>AtFRO2</i>             | GATGTGGCAACCACTTGGTTCGATA                                    |            |
| qFITf                         | <i>At2g28160</i>          | CAGTCACAAGCGAAGAACTCA                                        | Q-RT-PCR   |
| qFITr                         | <i>AtFIT1</i>             | CTTGTAAGAGATGGAGCAACACC                                      |            |
| NIG1 QS                       | <i>At1g47400</i>          | ATGTCTTTTGTGCGAAACTTGGC                                      | Q-RT-PCR   |
| NIG1 QA                       | <i>AtIRP1/AtIMA1</i>      | CACCACCATTCTCACTATATGCCAC                                    |            |
| qAtbHLH38f                    | <i>At3g56970</i>          | GACGGTACCACAGACTTATGAAGT                                     | Q-RT-PCR   |
| qAtbHLH38r                    | <i>AtbHLH38</i>           | TAAGCTCTTTGAAACCGTTTCAGGA                                    |            |
| qAtbHLH39f                    | <i>At3g56980</i>          | GACTTATGGAGCTGTTACAGCGGT                                     | Q-RT-PCR   |
| qAtbHLH39r                    | <i>AtbHLH39</i>           | CTTCAAGCTTCGAGAAACCGTCGCA                                    |            |
| q47400F                       | <i>At1g47400</i>          | TGATTGTAATTTAGGAGGAAACAAAA                                   | Q-RT-PCR   |
| q47400R                       | <i>AtIMA1</i>             | TCAATCCACAAGTAAACATCTATGG                                    |            |
| qAtEFf                        | <i>At5g19510</i>          | GCTGTTCGTGGTGTGAGATGC                                        | Q-RT-PCR   |
| qAtEFr                        | <i>AtEF1B</i>             | AGGCTCTGAGGTGAGGAAGTCT                                       |            |
| q30766F                       | <i>At2g30766</i>          | TGAGTCACAACAACGCAGAAAGG                                      | Q-RT-PCR   |
| q30766R                       | <i>AtIMA3</i>             | GGCCAAGTCTGAGTTGATTCTGT                                      |            |
| qIMA1alldelF                  | <i>At1g47400</i>          | TGAGTCACAACAACGCAGAAAGG                                      | Q-RT-PCR   |
| qIMA1alldelR                  | <i>AtIMA1, Δ1, Δ2, Δ3</i> | GGCCAAGTCTGAGTTGATTCTGT                                      |            |
| EF1α-QS                       | <i>AT5G60390</i>          | GAGCCCAAGTTTTTGAAGA                                          | Q-RT-PCR   |
| EF1α-QA                       | <i>AtEF1α</i>             | CTAACAGCGAAACGTCCCA                                          |            |
| IMA1 <sub>cDNA</sub> -BamHI F | <i>At1g47400</i>          | GCGGGATCCCATCAACATTTGAAGCTCA                                 | Cloning    |
| IMA1 <sub>cDNA</sub> -BamHI R | <i>IMA1 cDNA</i>          | CGCGGATCCGGAAACTAGCAATATTATAA                                |            |
| IMA1 <sub>CDS</sub> -XbaI F   | <i>At1g47400</i>          | AAATCTAGAATGATGTCTTTTGTGCGAAACTTG                            | Cloning    |
| IMA1 <sub>CDS</sub> -SacI R   | <i>IMA1 CDS</i>           | AAAGAGCTCTCACGCAGCAGGAGCATAATC                               |            |
| IMA3 <sub>CDS</sub> -XbaI F   | <i>At2g30766</i>          | AAATCTAGAATGGCAGTGGTGAGTCACAACAACGC                          | Cloning    |
| IMA3 <sub>CDS</sub> -SacI R   | <i>IMA3 CDS</i>           | AAAGAGCTCTCAAGCCCGCGGTGCAACG                                 |            |
| IMA1Δ1 F                      | <i>At1g47400</i>          | PO <sub>3</sub> <sup>2-</sup> -GCTTCCACCGTGTATGTT            | Cloning    |
| IMA1Δ1 R                      | <i>IMA1Δ1 CDS</i>         | PO <sub>3</sub> <sup>2-</sup> -TGCGACAAAAGACATCAT            |            |
| IMA1Δ2 F                      | <i>At1g47400</i>          | PO <sub>3</sub> <sup>2-</sup> -GAGAATGGTGGTGTGACGATG         | Cloning    |
| IMA1Δ2 R                      | <i>IMA1Δ2 CDS</i>         | PO <sub>3</sub> <sup>2-</sup> -ATCTACCACATCTTCAACATACACGG    |            |
| IMA1Δ3 F                      | <i>At1g47400</i>          | PO <sub>3</sub> <sup>2-</sup> -AGTGGCTATGATTATGCTCCTGC       | Cloning    |
| IMA1Δ3 R                      | <i>IMA1Δ3 CDS</i>         | PO <sub>3</sub> <sup>2-</sup> -ACCATTCTCACTATATGCCACTCGAGAAC |            |
| M13 F                         | <i>pIMA1TOPO</i>          | GTTGTAAAACGACGGCCAGTC                                        | Cloning    |
| M13 R                         |                           | TGCCAGGAAACAGCTATGACC                                        |            |
| EYFP ATG F                    | <i>EYFP</i>               | CACCATGGTGTGAGCAAGGGCGAGG                                    | Cloning    |
| EYFP STOP R                   | <i>in pGWB541</i>         | TCACTGTACAGCTCGTCCATGC                                       |            |
| IMA1 <sub>pep</sub> F         | <i>At1g47400</i>          | CACCATGGTGGTGTGACGATGACAGTGGCTATGAT                          | Cloning    |
| IMA1 <sub>pep</sub> R         | <i>IMA1<sub>pep</sub></i> | TCACGCAGCAGGAGCATAATCATAGCCACTGTC                            |            |
| promIMA1 F                    | <i>At1g47400</i>          | CACCGTGTCTTAGTCCTTAACCACAATCAC                               | Cloning    |
| promIMA1 R                    | <i>IMA1 promoter</i>      | TGATATTTTTTGTGGATATGAATGAAAG                                 |            |
| IMA2 GE seq F                 | <i>At1g47395</i>          | TTCGCAAACCTCCATAGAGGCATC                                     | Genotyping |
| IMA6 GE seq R                 | 6 IMAs genomic region     | CTACCATGATCATCACAATTTACAGGC                                  |            |
| IMA3 GE seq F                 | <i>At2g30766</i>          | CAACTCCATGACACAATGGTTTTTGACC                                 | Genotyping |
| IMA3 GE seq R                 | IMA3 genomic region       | GACCACAAAAGGCTGAGCAAAGG                                      |            |
| IMA7 GE seq F                 | <i>At2g44744</i>          | CGAAGGATGTGTCAGGGCACAA                                       | Genotyping |
| IMA7 GE seq R                 | IMA7 genomic region       | GGTGCAGGCTCTTTTCTTGAGT                                       |            |
